# Supplementary material for: Time-sensitive prefrontal involvement in associating confidence with task performance illustrates metacognitive introspection in monkeys
Source: PubMed Central journal article supplement (PMC9363445; doi:10.1038/s42003-022-03762-6), 2022-08-09
Supplement: 42003_2022_3762_MOESM2_ESM.pdf [file 42003_2022_3762_MOESM2_ESM.pdf]

## Description of Additional Supplementary Files

**File name:** Supplementary Data 1

**Description:** The source data behind the graphs in the paper.
